# Supplementary material for: Sintered Glass Monoliths as Supports for Affinity Columns
Source: MDPI journal article supplement (doi:10.3390/separations8050056), 2021-04-30
Supplement: s1 [file s1]

Archive with 3 entries (3 files):
- Supplement_1.pdf
- Supplement_2.zip
- Supplement_3.zip
